# Supplementary material
Source: MDPI journal article supplement (https://www.mdpi.com/2075-4701/11/9/1491)
Supplement: s1 [file s1]

# Preparation of Ag<sup>0</sup> Nanoparticles by EDM Method as Catalysts for Oxygen Reduction

Jia Guo, Xiaoming Mu, Shihao Song, Yanwei Ren, Kai Wang and Zunming Lu \*

School of Materials Science and Engineering, Hebei University of Technology, 8 Guangrong Road, Tianjin 300132, China; guojia718@126.com (J.G.); 18438597652@163.com (X.M.); 18722688805@163.com (S.S.); yw\_ren1995@163.com (Y.R.); 18337281204@163.com (K.W.)

\* Correspondence: luzunming@hebut.edu.cn; Tel.: +13920775272

Calculating microstrain from XRD data using the Williamson–Hall (W–H) plot method:

Total broadening = broadening due to crystallite size + broadening due to strain

$$\beta_T = \beta_D + \beta_\varepsilon \quad (1)$$

$\beta_T$  is the total broadening,  $\beta_D$  is broadening due to crystallite size and  $\beta_\varepsilon$  is broadening due to strain.

From the Scherer equation, we know that

$$\beta_D = \frac{K\lambda}{D \cos\theta} \quad (2)$$

where  $\beta_D$  is the FWHM (i.e., broadening of the peak) in radians,  $K = 0.9$  is the shape factor,  $\lambda = 0.1546$  nm is the wavelength of the X-ray source,  $D$  is the crystallite size, and  $\theta$  is the peak position in radians.

Similarly, the XRD peak-broadening due to microstrain is given by,

$$\beta_\varepsilon = 4\varepsilon \tan\theta \quad (3)$$

where  $\beta_\varepsilon$  is broadening due to strain,  $\varepsilon$  is the strain, and  $\theta$  is the peak position in radians.

From the Scherer equation, we know that

$$\beta_T \cos\theta = \varepsilon(4 \sin\theta) + \frac{K\lambda}{D} \quad (4)$$

Equation (4) represents a straight line, in which  $\varepsilon$  is the gradient (slope) of the line and  $\frac{K\lambda}{D}$  is the y-intercept.

Consider the standard equation of a straight line,

$$y = mx + c \quad (5)$$

where “ $m$ ” is the slope of line and “ $c$ ” is the y-intercept.

Comparing Equation (4) with Equation (5), we have,

$$y = \beta_T \cos\theta \quad (i) \quad (6)$$

$$m = \varepsilon \quad (ii) \quad (7)$$

$$x = 4 \sin\theta \quad (iii) \quad (8)$$

The value of “ $m$ ,” which represents the gradient (slope) of the line, leads to the value of the strain, “ $\varepsilon$ ”.

Tables S1 and S2 show the data results for NPS-Ag<sup>0</sup> and Ag, respectively.

**Table S1.** Data results of NPS-Ag<sup>0</sup>.

| NO. | 2 $\theta$ (Degrees) | FWHM( $\beta_T$ ) in Degrees | $\beta_T \cos\theta$ | 4 sin $\theta$ |
|-----|----------------------|------------------------------|----------------------|----------------|
| 1   | 38.153               | 0.20522                      | 0.003582             | 1.30732        |
| 2   | 44.341               | 0.25063                      | 0.004374             | 1.509459       |
| 3   | 64.500               | 0.33027                      | 0.005764             | 2.134466       |
| 4   | 77.461               | 0.4215                       | 0.007356             | 2.502628       |
| 5   | 81.596               | 0.39491                      | 0.006892             | 2.613584       |

**Table S2.** Data results of Ag.

| NO | 2 $\theta$ (Degrees) | FWHM( $\beta_T$ ) in Degrees | $\beta_T \cos\theta$ | 4 sin $\theta$ |
|----|----------------------|------------------------------|----------------------|----------------|
| 1  | 38.121               | 0.33645                      | 0.00555              | 1.306232       |
| 2  | 44.277               | 0.51932                      | 0.008396             | 1.507161       |
| 3  | 64.430               | 0.46755                      | 0.006904             | 2.132391       |
| 4  | 77.472               | 0.55038                      | 0.007493             | 2.502877       |
| 5  | 81.536               | 0.50417                      | 0.006665             | 2.611832       |

To make a W-H plot, we will need to obtain the following data, then perform a linear fit.

Subsequently, we can obtain the strain values of  $2.71 \times 10^{-3}$ ,  $2.44 \times 10^{-4}$  for NPS-Ag<sup>0</sup> and Ag, respectively.

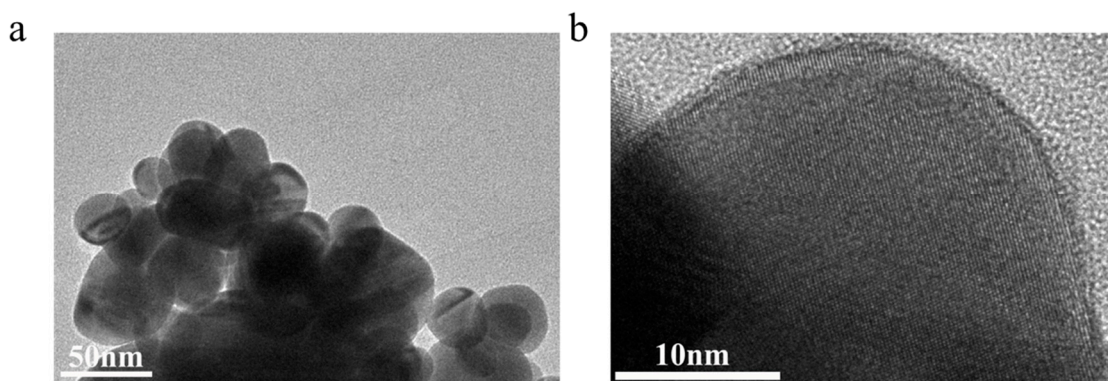**Figure S1.** (a) and (b) TEM images of the Ag.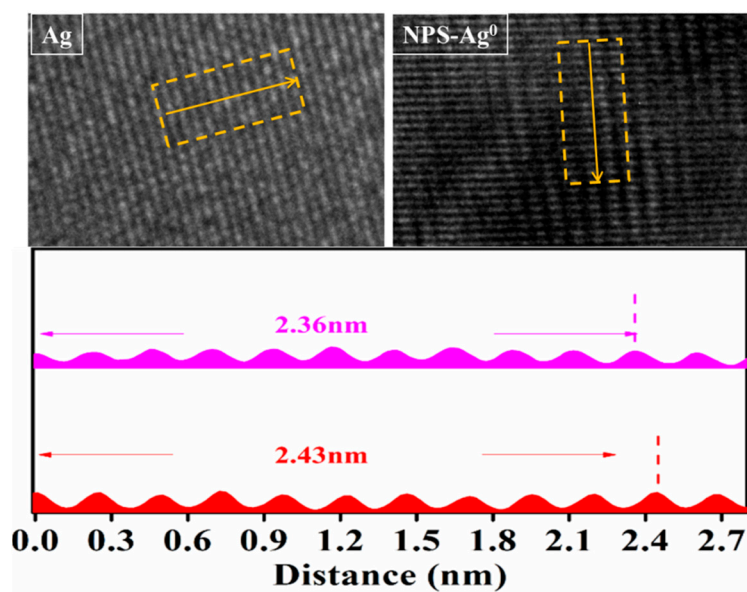**Figure S2.** NPS-Ag<sup>0</sup> and Ag lattice spacing.

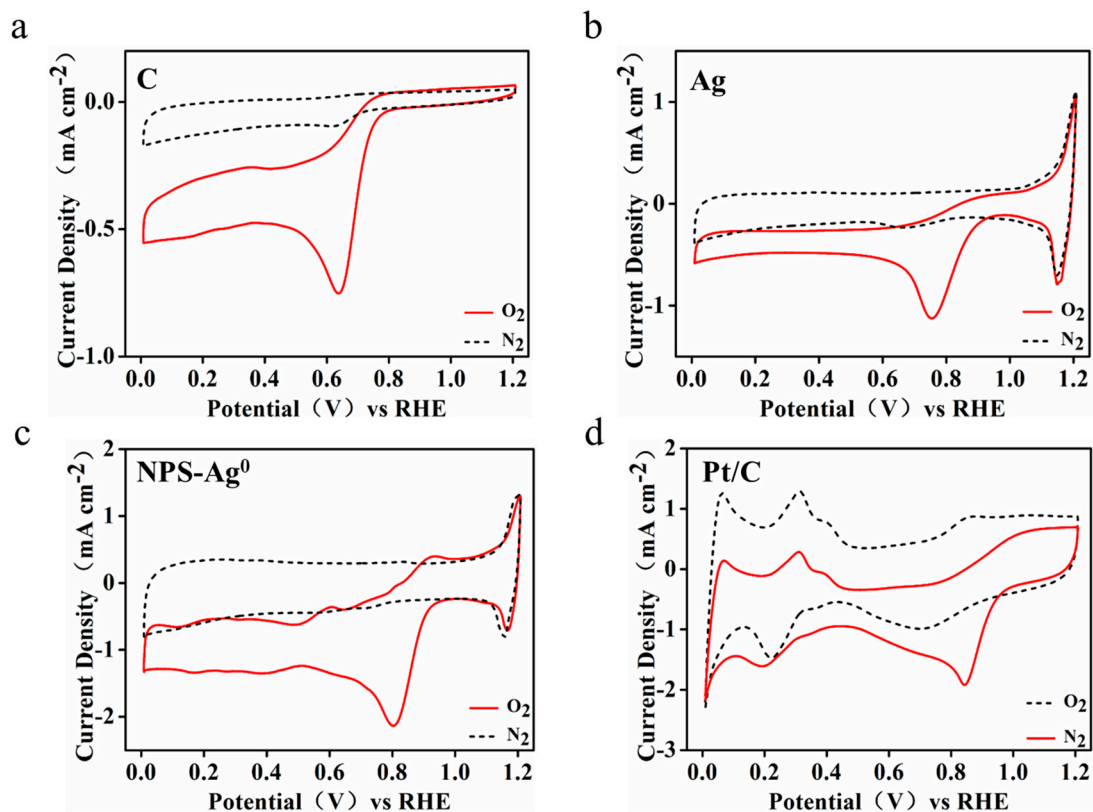

**Figure S3.** CV plots in  $\text{N}_2$  and  $\text{O}_2$  saturated 0.1 M KOH solution at a scan rate of 50 mV/s for (a) C, (b) Ag, (c) NPS- $\text{Ag}^0$  and (d) Pt/C, respectively.

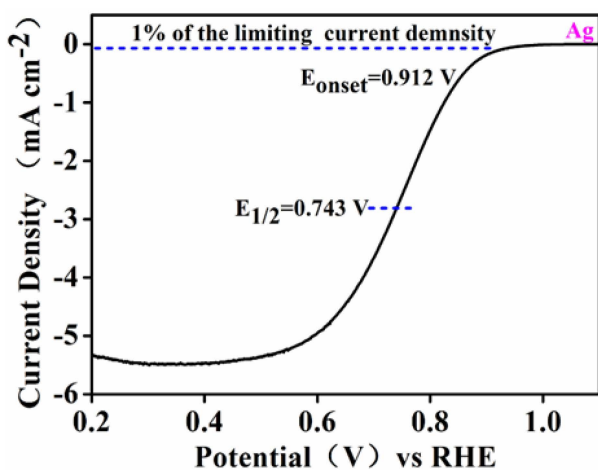

**a**

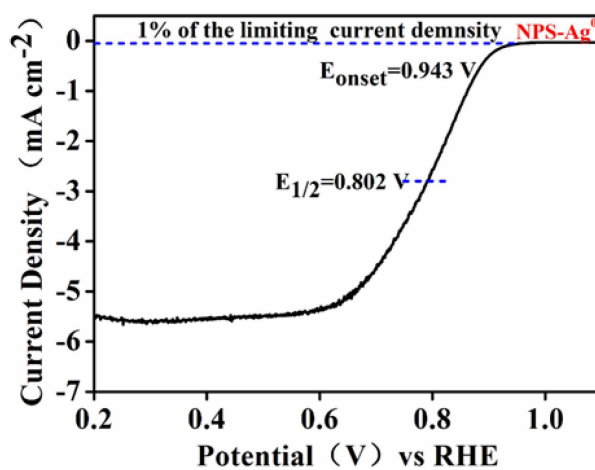

**b**

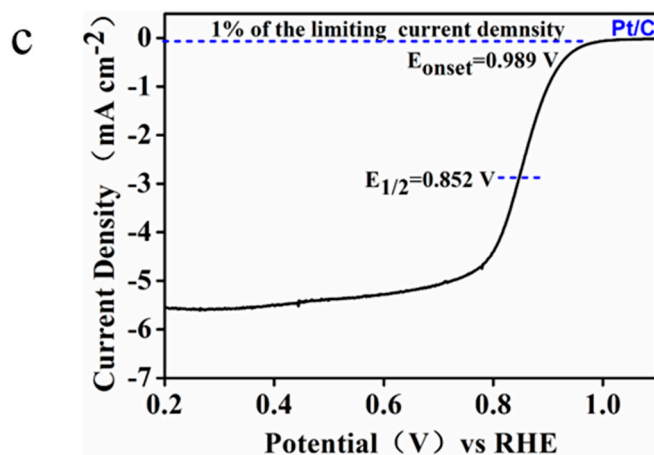

**Figure S4.** The  $E_{\text{onset}}$  and  $E_{1/2}$  obtained from ORR polarization curves in  $\text{O}_2$  saturated 0.1 M KOH solution at 298 K with a scan rate of  $10 \text{ mV s}^{-1}$  and a rotation rate of 1600 rpm for (a) Ag (b) NPS-Ag<sup>0</sup>, and (c) Pt/C.

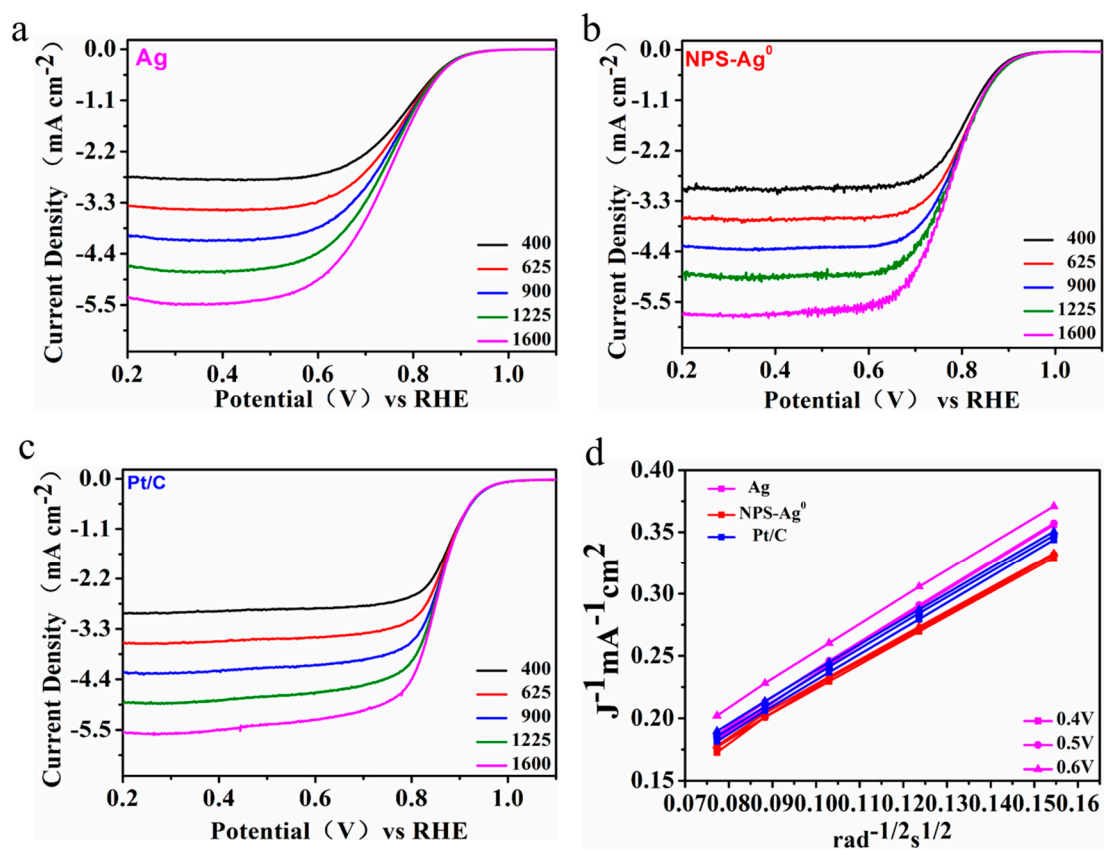

**Figure S5.** ORR polarization curves at different rotation rates with Koutecky–Levich plots.

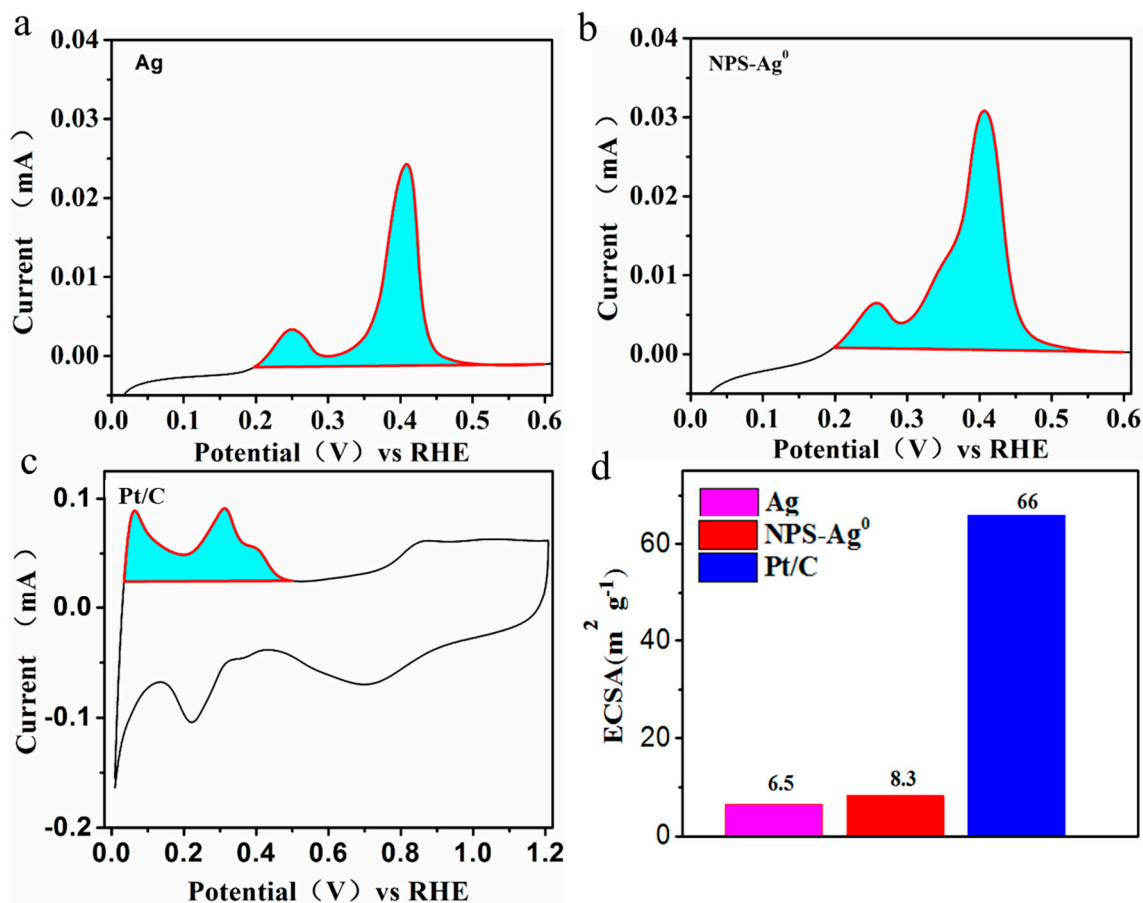

**Figure S6.** (a) and (b) Pb-stripping voltammograms used to measure the ECSA of NPS-Ag<sup>0</sup> and Ag catalysts at 10 mV s<sup>-1</sup> in 0.1 M KOH solution with 125  $\mu$ M Pb(NO<sub>3</sub>)<sub>2</sub> added. (c) H-stripping voltammograms used to measure the ECSA of Pt catalyst. (d) Summary of calculated ECSA for catalysts.
